# Supplementary material for: Aspect-ratio controllable growth of rectangular cesium lead bromide crystallites on PTAA modified substrates
Source: Royal Society of Chemistry journal article supplement (doi:10.1039/d2tc00651k), 2022-01-01
Supplement: d2tc00651k2.pdf [file d2tc00651k2.pdf]

**Aspect-ratio controllable growth of rectangular cesium lead bromide crystallites  
on PTAA modified substrate**

*Junhan Guo, Yang Tang, Longtao Li, Pengcheng Jia, Bo Song, Xin Liu, Xiaomeng Li,  
Zhenbo Deng, Zhidong Lou, Yufeng Hu, Feng Teng, Liang Qin<sup>\*</sup>, Yanbing Hou<sup>\*</sup>*

Key Laboratory of Luminescence and Optical Information Ministry of Education

Beijing JiaoTong University

Beijing 100044, P. R. China.

E-mail address: [qinliang@bjtu.edu.cn](mailto:qinliang@bjtu.edu.cn); [ybhou@bjtu.edu.cn](mailto:ybhou@bjtu.edu.cn)

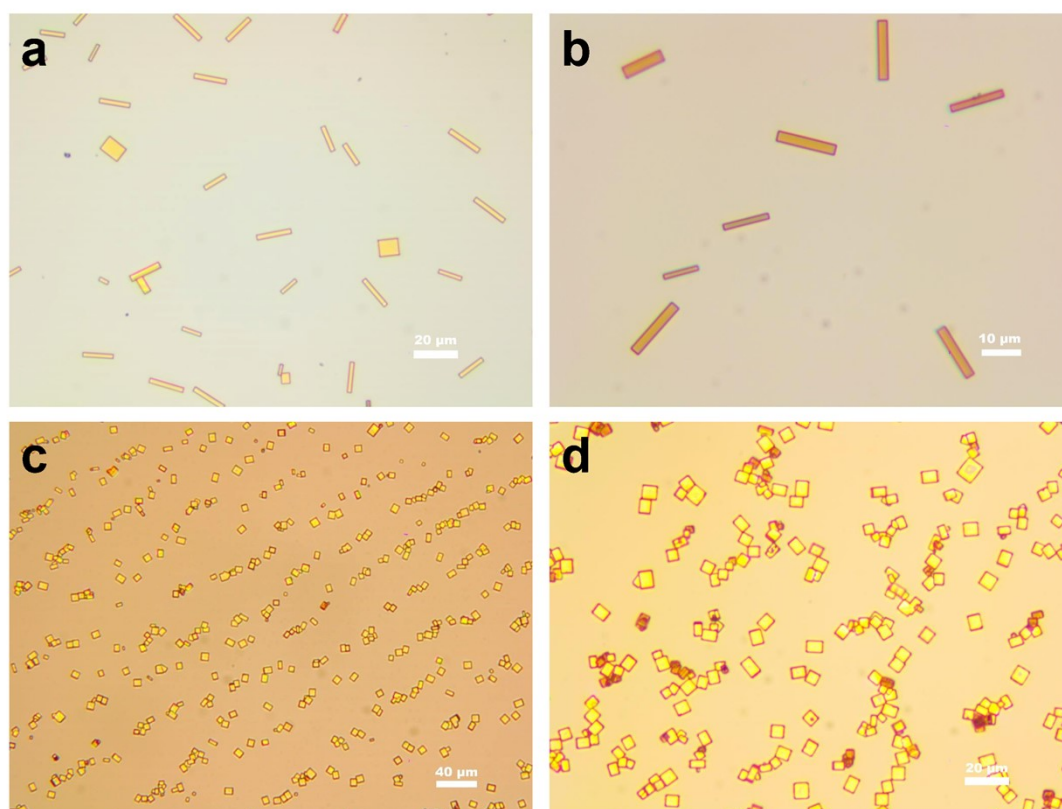

**Figure S1.** (a, b) Microscopic images of CsPbBr<sub>3</sub> crystallites with large aspect ratio at low and high magnification. (c, d) Microscopic images of CsPbBr<sub>3</sub> crystallites with small aspect ratio at low and high magnification.

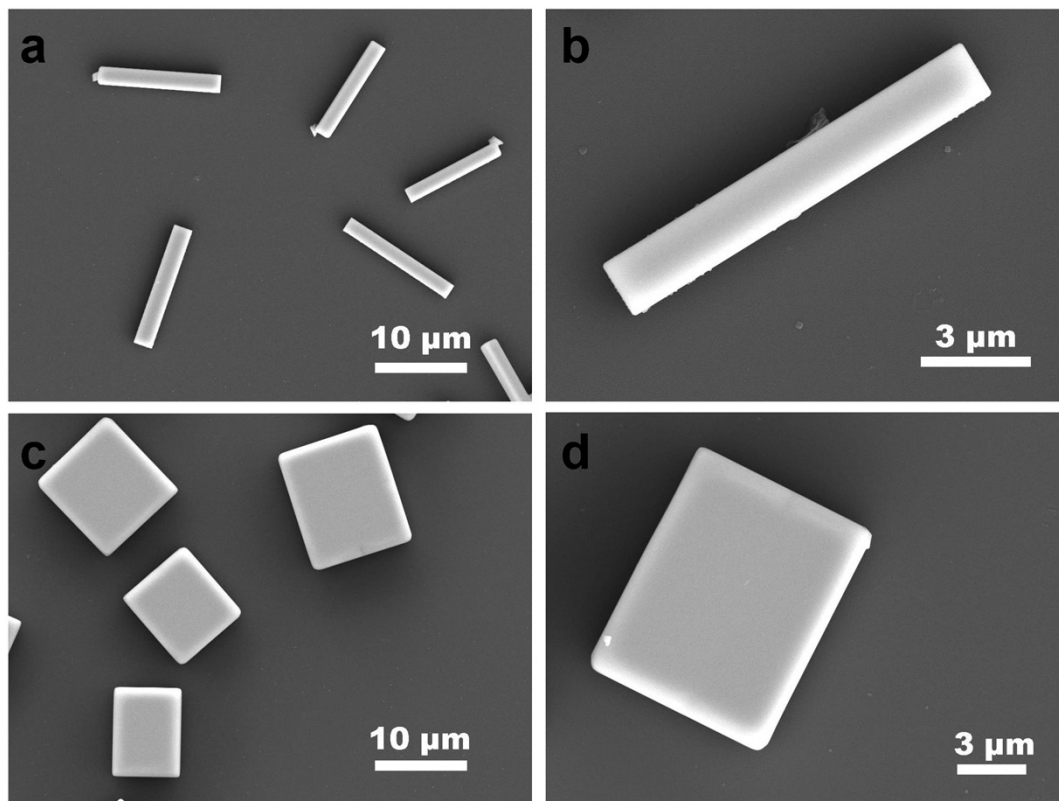

**Figure S2.** (a, b) The large aspect ratio  $\text{CsPbBr}_3$  crystallites have lengths of 5-20  $\mu\text{m}$ .

(c, d) The small aspect ratio  $\text{CsPbBr}_3$  crystallites have edge sizes of 5-10  $\mu\text{m}$ .

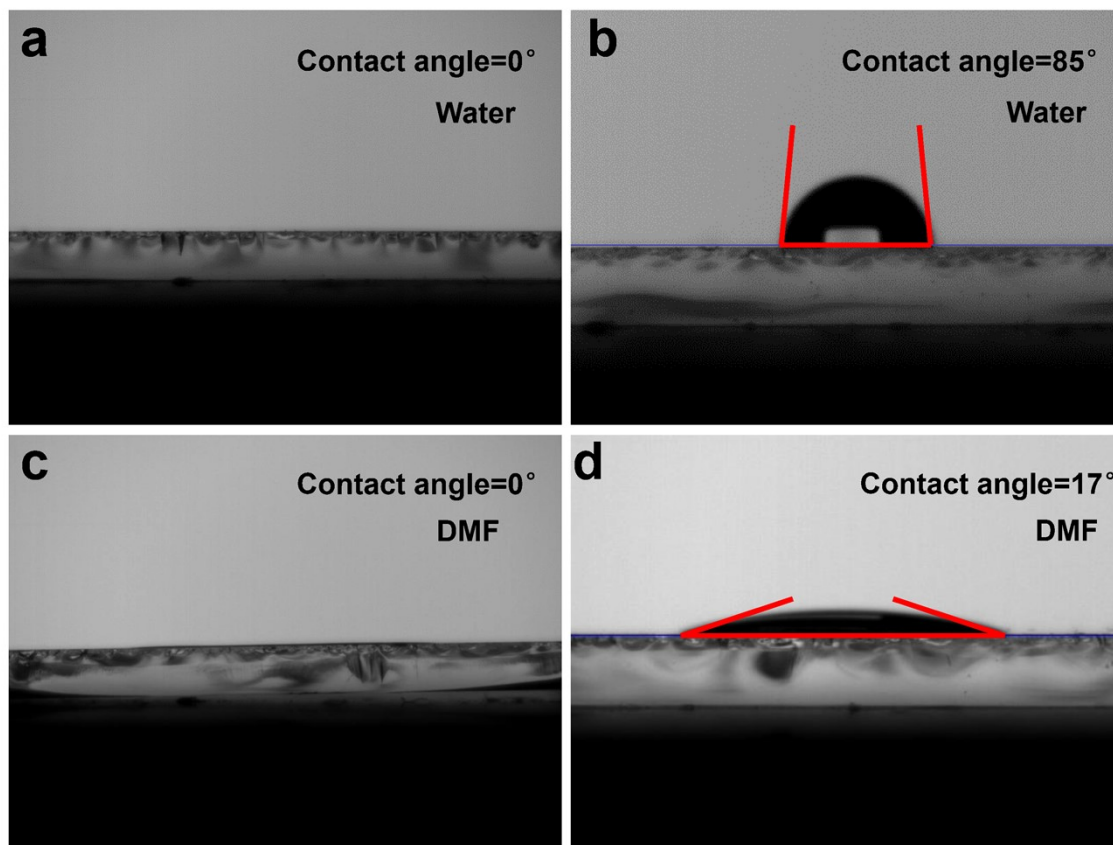

**Figure S3.** (a) Contact angle of deionized water on UV/O<sub>3</sub> treated glass surface. (b) Contact angle of deionized water on PTAA-coated glass surface. (c) Contact angle of DMF on UV/O<sub>3</sub> treated glass surface. (d) Contact angle of DMF on PTAA-coated glass surface.

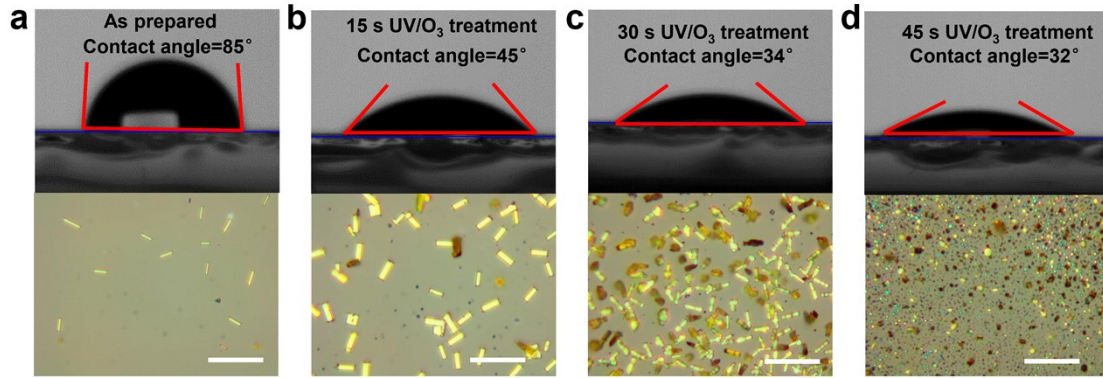

**Figure S4.** The contact angle of deionized water on PTAA-coated glass substrates treated by UV/O<sub>3</sub> for different times (above), and the pictures of prepared perovskite crystallites on UV/O<sub>3</sub> treated PTAA-coated glass substrates (below). The scale bar is 30 μm.

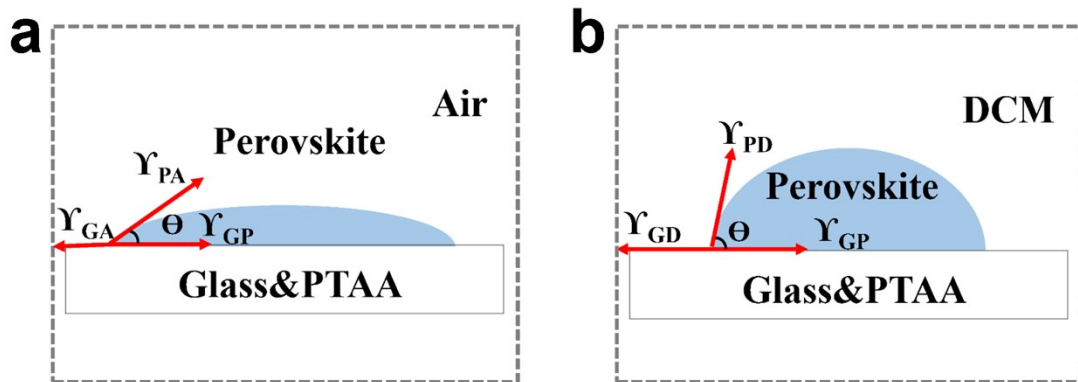

**Figure S5.** (a) Schematic diagram of the perovskite precursor dripping onto a PTAA modified glass substrate in air. (b) Schematic diagram of the perovskite precursor dripping onto a PTAA modified glass substrate in DCM.

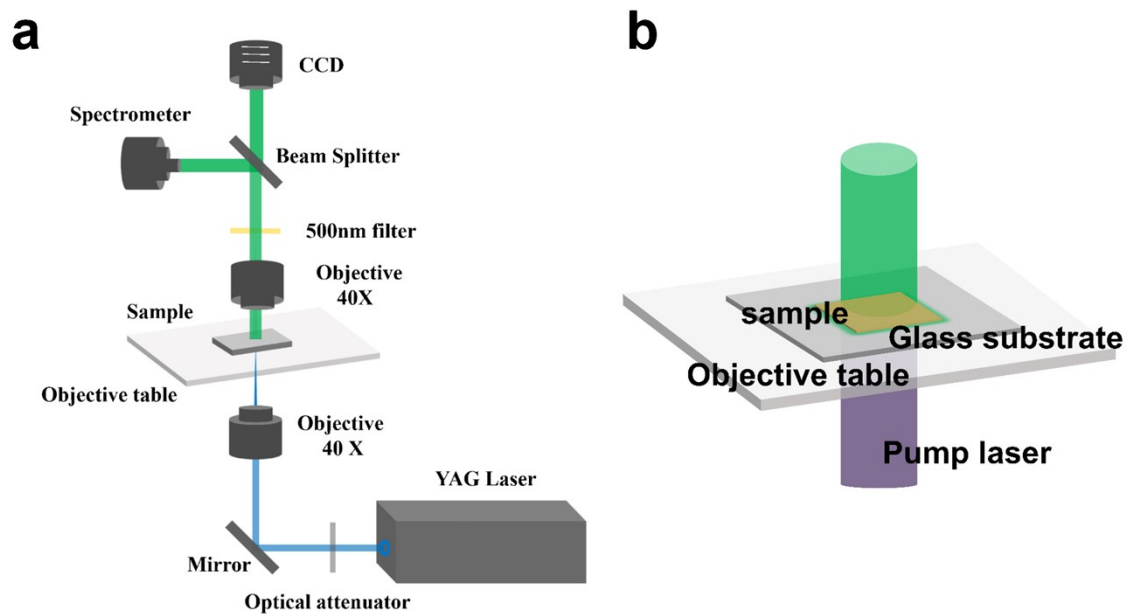

**Figure S6.** (a, b) Schematic diagram of laser performance test of CsPbBr<sub>3</sub> crystallites.

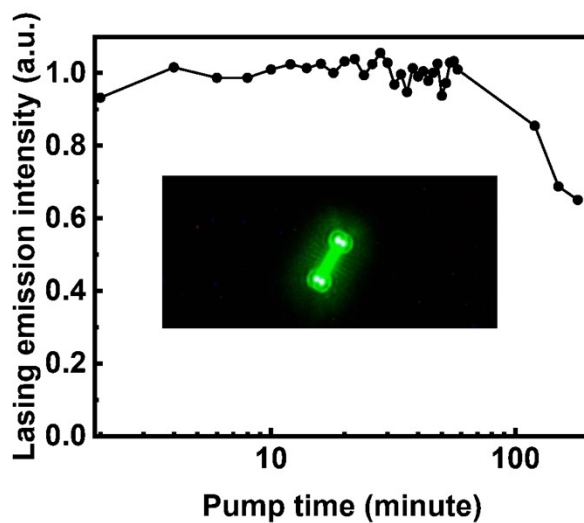

**Figure S7.** The relationship between the laser emission intensity and the pumping time of the CsPbBr<sub>3</sub> crystallite under the continuous irradiation of a 450 nm pulsed laser (5 ns, 10 Hz, 1.2P<sub>Th</sub>) for 3 h at room temperature.
